# Supplementary material for: Trends and inequities in the diagnosis and treatment of poststroke depression: a retrospective cohort study of privately insured patients in the USA, 2003–2020
Source: HighWire-hosted journal article supplement (doi:10.1136/jnnp-2022-330179), 2022-11-18
Supplement: jnnp-2022-330179supp001_data_supplement.pdf [file jnnp-2022-330179supp001_data_supplement.pdf]

**Supplemental Table 1.** Diagnostic codes from the International Classification of Diseases for Stroke\*

| Stroke Type                    | Revision | Code   | Definition                                      |
|--------------------------------|----------|--------|-------------------------------------------------|
| Ischemic stroke (IS)           | ICD-9    | 362.3  | Retinal vascular occlusion                      |
|                                | ICD-9    | 433.x1 | Occlusion and stenosis of precerebral arteries  |
|                                | ICD-9    | 434.x1 | Occlusion of cerebral arteries                  |
|                                | ICD-9    | 436    | Acute, but ill-defined, cerebrovascular disease |
|                                | ICD-10   | H34.1  | Central retinal artery occlusion                |
|                                | ICD-10   | I63.x  | Cerebral infarction                             |
| Intracerebral hemorrhage (ICH) | ICD-9    | 431.x  | Intracerebral hemorrhage                        |
|                                | ICD-10   | I61.x  | Intracerebral hemorrhage                        |
| Subarachnoid hemorrhage (SAH)  | ICD-9    | 430.x  | Subarachnoid hemorrhage                         |
|                                | ICD-10   | I60.x  | Subarachnoid hemorrhage                         |

\*Stroke classification derived from Kokotailo and Hill (2005)

**Supplemental Table 2.** Diagnostic codes from the International Classification of Diseases used to identify depressive disorders

| Outcome Version               | Revision | Code                                                                                            | Definition                                                               |
|-------------------------------|----------|-------------------------------------------------------------------------------------------------|--------------------------------------------------------------------------|
| Major Depression <sup>1</sup> | ICD-9    | 296.2x                                                                                          | Major depressive disorder, single episode                                |
|                               | ICD-9    | 296.3x                                                                                          | Major depressive disorder, recurrent episode                             |
|                               | ICD-10   | F32.x                                                                                           | Major depressive disorder, single episode                                |
|                               | ICD-10   | F33.x                                                                                           | Major depressive disorder, recurrent episode                             |
| Depressive Disorders          | ICD-9    | 293.83                                                                                          | Mood disorder in conditions classified elsewhere                         |
|                               | ICD-9    | 293.9                                                                                           | Unspecified transient mental disorder in conditions classified elsewhere |
|                               | ICD-9    | 296.90                                                                                          | Unspecified episodic mood disorder                                       |
|                               | ICD-9    | 296.99                                                                                          | Other specified episodic mood disorder                                   |
|                               | ICD-9    | 300.4                                                                                           | Dysthymic disorder                                                       |
|                               | ICD-9    | 301.10                                                                                          | Affective personality disorder                                           |
|                               | ICD-9    | 301.12                                                                                          | Chronic depressive personality disorder                                  |
|                               | ICD-9    | 301.13                                                                                          | Cyclothymic disorder                                                     |
|                               | ICD-9    | 309.0                                                                                           | Adjustment reaction with depressed mood                                  |
|                               | ICD-9    | 309.1                                                                                           | Prolonged depressive reaction                                            |
|                               | ICD-9    | 309.28                                                                                          | Adjustment disorder with mixed anxiety and depressed mood                |
|                               | ICD-9    | 311                                                                                             | Depressive disorder, not elsewhere classified                            |
|                               | ICD-9    | 316                                                                                             | Psychic factors associated with diseases classified elsewhere            |
|                               | ICD-10   | F05.30                                                                                          | Mood disorder due to known physiological condition, unspecified          |
|                               | ICD-10   | F06                                                                                             | Other mental disorders due to known physiological condition              |
|                               | ICD-10   | F06.8                                                                                           | Other specified mental disorders due to known physiological condition    |
|                               | ICD-10   | F34.x                                                                                           | Persistent mood disorders                                                |
|                               | ICD-10   | F39                                                                                             | Unspecified mood disorders                                               |
|                               | ICD-10   | F43.21                                                                                          | Adjustment disorder with depressed mood                                  |
|                               | ICD-10   | F43.23                                                                                          | Adjustment disorder with mixed anxiety and depressed mood                |
| ICD-10                        | F54      | Psychological and behavioral factors associated with disorders or diseases elsewhere classified |                                                                          |

1. Excluding major depressive disorder, single episode in full remission (296.26, F32.5); major depressive disorder, recurrent episode in full remission (296.36, F33.4) and premenstrual dysphoric disorder (F32.81)

**Supplemental Table 3.** Antidepressants by drug class

|                                                         |                                     |
|---------------------------------------------------------|-------------------------------------|
| Selective Serotonin Reuptake Inhibitors (SSRI)          | Citalopram                          |
|                                                         | Escitalopram                        |
|                                                         | Fluoxetine                          |
|                                                         | Fluvoxamine                         |
|                                                         | Fluvoxamine CR                      |
|                                                         | Paroxetine                          |
|                                                         | Paroxetine CR                       |
|                                                         | Sertraline                          |
| Serotonin and Norepinephrine Reuptake Inhibitors (SNRI) | Desvenlafaxine                      |
|                                                         | Duloxetine                          |
|                                                         | Levomilnacipran                     |
|                                                         | Milnacipran                         |
|                                                         | Venlafaxine                         |
|                                                         | Venlafaxine XR                      |
| Tricyclic Antidepressants (TCA)                         | Amitriptyline                       |
|                                                         | Amoxapine                           |
|                                                         | Clomipramine                        |
|                                                         | Desipramine                         |
|                                                         | Doxepine                            |
|                                                         | Imipramine                          |
|                                                         | Maprotiline                         |
|                                                         | Nortriptyline                       |
|                                                         | Protriptyline                       |
|                                                         | Trimipramine                        |
|                                                         | Monoamine Oxidase Inhibitors (MAOI) |
| Selegiline                                              |                                     |
| Tranylcypromine                                         |                                     |
| Atypical Antidepressants                                | Bupropion                           |
|                                                         | Mirtazapine                         |
|                                                         | Nefazodone                          |
|                                                         | Trazodone                           |
|                                                         | Vilazodone                          |
|                                                         | Vortioxetine                        |

**Supplemental Table 4.** Crude rates of depression diagnosis following first stroke, 2003 - 2020

|              | All Stroke             |                               | IS                     |                               | ICH                  |                               | SAH                  |                               |
|--------------|------------------------|-------------------------------|------------------------|-------------------------------|----------------------|-------------------------------|----------------------|-------------------------------|
|              | Events / PM            | Rate (95% CI)<br>Per 1,000 PM | Events / PM            | Rate (95% CI)<br>Per 1,000 PM | Events / PM          | Rate (95% CI)<br>Per 1,000 PM | Events / PM          | Rate (95% CI)<br>Per 1,000 PM |
| 2003         | 2256 / 255663          | 8.8 (8.5,9.2)                 | 2049 / 236807          | 8.7 (8.3,9.0)                 | 120 / 10915          | 11.0 (9.1,13.1)               | 87 / 7942            | 11.0 (8.8,13.5)               |
| 2004         | 1644 / 176201          | 9.3 (8.9,9.8)                 | 1437 / 161008          | 8.9 (8.5,9.4)                 | 126 / 8816           | 14.3 (11.9,17.0)              | 81 / 6377            | 12.7 (10.1,15.8)              |
| 2005         | 1725 / 176073          | 9.8 (9.3, 10.3)               | 1482 / 159070          | 9.3 (8.9,9.8)                 | 157 / 10518          | 14.9 (12.7,17.4)              | 86 / 6486            | 13.3 (10.6,16.4)              |
| 2006         | 2148 / 237485          | 9.0 (8.7, 9.4)                | 1856 / 214320          | 8.7 (8.3,9.1)                 | 184 / 14336          | 12.8 (11.1,14.8)              | 108 / 8829           | 12.2 (10.0,14.7)              |
| 2007         | 2902 / 302565          | 9.6 (9.3,9.9)                 | 2529 / 272090          | 9.3 (8.9,9.7)                 | 223 / 18351          | 12.2 (10.6,13.8)              | 150 / 1225           | 12.4 (10.5,14.5)              |
| 2008         | 3729 / 403719          | 9.2 (8.9,9.5)                 | 3265 / 366012          | 8.9 (8.6,9.2)                 | 294 / 23646          | 12.4 (11.1,13.9)              | 170 / 14061          | 12.1 (10.3,14.0)              |
| 2009         | 4102 / 408268          | 10.1 (9.7,10.4)               | 3578 / 367966          | 9.7 (9.4,10.0)                | 326 / 24907          | 13.1 (11.7,14.6)              | 198 / 15396          | 12.9 (11.1,14.8)              |
| 2010         | 4301 / 409894          | 10.5 (10.2,10.8)              | 3750 / 366659          | 10.2 (9.9,10.6)               | 345 / 26733          | 12.9 (11.6,14.3)              | 206 / 16501          | 12.5 (10.8,14.3)              |
| 2011         | 4477 / 407437          | 11.0 (10.7,11.3)              | 3863 / 364630          | 10.6 (10.3,10.9)              | 388 / 26253          | 14.8 (13.4,16.3)              | 226 / 16551          | 13.7 (11.9,15.5)              |
| 2012         | 5132 / 425114          | 12.1 (11.8,12.4)              | 4404 / 378242          | 11.6 (11.3,12.0)              | 465 / 28168          | 16.5 (15.1,18.1)              | 263 / 18704          | 14.1 (12.4,15.9)              |
| 2013         | 5662 / 446016          | 12.7 (12.34,13.0)             | 4902 / 396134          | 12.4 (12.0,12.7)              | 477 / 29989          | 15.9 (14.5,17.4)              | 283 / 19892          | 14.2 (12.6,16.0)              |
| 2014         | 5655 / 424022          | 13.3 (13.0, 13.7)             | 4821 / 375263          | 12.8 (12.5,13.2)              | 513 / 29061          | 17.7 (16.2,19.2)              | 321 / 1697           | 16.3 (14.6,18.2)              |
| 2015         | 6136 / 487684          | 12.6 (12.3,12.9)              | 5290 / 430353          | 12.3 (11.2,12.6)              | 516 / 33443          | 15.4 (14.1,16.8)              | 330 / 23887          | 13.8 (12.4,15.4)              |
| 2016         | 6226 / 499842          | 12.5 (12.2,12.8)              | 5281 / 438356          | 12.0 (11.7,12.4)              | 562 / 34607          | 16.2 (14.9,17.6)              | 383 / 26879          | 14.2 (12.9,15.7)              |
| 2017         | 7654 / 644794          | 11.9 (11.6,12.1)              | 6637 / 572049          | 11.6 (11.3,11.9)              | 599 / 42834          | 14.0 (12.9,15.1)              | 418 / 29911          | 14.0 (12.7,15.4)              |
| 2018         | 8730 / 717936          | 12.2 (11.9,12.4)              | 7554 / 636720          | 11.9 (11.6,12.1)              | 696 / 47061          | 14.8 (13.7,15.9)              | 480 / 34156          | 14.1 (12.8,15.4)              |
| 2019         | 8224 / 627058          | 13.1 (12.8,13.4)              | 7035 / 555163          | 12.7 (12.4,13.0)              | 674 / 40624          | 16.6 (15.4,17.9)              | 515 / 31270          | 16.5 (15.1,17.9)              |
| 2020         | 1685 / 89184           | 18.9 (18.0,19.8)              | 1429 / 77854           | 18.4 (17.4,19.3)              | 138 / 6366           | 21.7 (18.2,25.6)              | 118 / 4964           | 23.8 (19.7,28.4)              |
| <b>Total</b> | <b>82388 / 7138953</b> | <b>11.5 (11.4,11.6)</b>       | <b>71162 / 6368698</b> | <b>11.2 (11.1,11.3)</b>       | <b>6803 / 456630</b> | <b>14.9 (14.5,15.2)</b>       | <b>4423 / 313625</b> | <b>14.1 (13.7,14.5)</b>       |

**Supplemental Table 5.** Crude rates of depression diagnosis following first stroke by gender, 2003 - 2020

|              | <b>Women</b>           |                               | <b>Men</b>             |                               |
|--------------|------------------------|-------------------------------|------------------------|-------------------------------|
|              | Events / PM            | Rate (95% CI)<br>Per 1,000 PM | Events / PM            | Rate (95% CI)<br>Per 1,000 PM |
| 2003         | 1349 / 129849          | 10.4 (9.8, 11.0)              | 907 / 125814           | 7.2 (6.7, 7.7)                |
| 2004         | 1012 / 90599           | 11.2 (10.5, 11.9)             | 632 / 85602            | 7.4 (6.8, 8.0)                |
| 2005         | 1038 / 88650           | 11.7 (11.0, 12.4)             | 687 / 87423            | 7.9 (7.3, 8.5)                |
| 2006         | 1325 / 124516          | 10.6 (10.1, 11.2)             | 823 / 112970           | 7.9 (7.3, 8.5)                |
| 2007         | 1830 / 162418          | 11.3 (10.8, 11.8)             | 1072 / 140148          | 7.3 (6.8, 7.8)                |
| 2008         | 2337 / 215787          | 10.8 (10.4, 11.3)             | 1392 / 187931          | 7.6 (7.2, 8.1)                |
| 2009         | 2589 / 218263          | 11.9 (11.4, 12.3)             | 1513 / 190005          | 7.4 (7.0, 7.8)                |
| 2010         | 2677 / 213551          | 12.5 (12.1, 13.0)             | 1624 / 196344          | 8.0 (7.6, 8.4)                |
| 2011         | 2793 / 213786          | 13.1 (12.6, 13.6)             | 1684 / 193648          | 8.3 (7.9, 8.7)                |
| 2012         | 3205 / 223247          | 14.4 (13.8, 14.8)             | 1927 / 201867          | 8.7 (8.3, 9.1)                |
| 2013         | 3500 / 230190          | 15.3 (14.7, 15.7)             | 2162 / 215826          | 9.5 (9.1, 10.0)               |
| 2014         | 3498 / 218571          | 16.0 (15.5, 16.5)             | 2157 / 205451          | 10.0 (9.6, 10.4)              |
| 2015         | 3841 / 257035          | 14.9 (14.5, 15.4)             | 2295 / 230650          | 10.5 (10.1, 10.9)             |
| 2016         | 3913 / 264212          | 14.8 (14.4, 15.3)             | 2313 / 235630          | 10.0 (9.5, 10.4)              |
| 2017         | 4802 / 341210          | 14.1 (13.7, 14.5)             | 2852 / 303584          | 9.8 (9.4, 10.2)               |
| 2018         | 5450 / 383489          | 14.2 (13.8, 15.6)             | 3280 / 334447          | 9.4 (9.1, 9.7)                |
| 2019         | 5266 / 335310          | 15.7 (15.3, 16.1)             | 2958 / 291748          | 9.8 (9.5, 10.1)               |
| 2020         | 1075 / 47404           | 22.7 (21.4, 24.1)             | 610 / 41780            | 14.6 (13.5, 15.8)             |
| <b>Total</b> | <b>51500 / 3758087</b> | <b>13.7 (13.4, 13.8)</b>      | <b>30888 / 3380867</b> | <b>9.1 (9.0, 9.2)</b>         |

**Supplemental Table 6.** Crude rates of depression diagnosis following first stroke by age category, 2003 - 2020

|              | 18 – 34 Years |                               | 35 – 49 Years |                               | 50 – 64 Years   |                               | 65 and Older    |                               |
|--------------|---------------|-------------------------------|---------------|-------------------------------|-----------------|-------------------------------|-----------------|-------------------------------|
|              | Events / PM   | Rate (95% CI)<br>Per 1,000 PM | Events / PM   | Rate (95% CI)<br>Per 1,000 PM | Events / PM     | Rate (95% CI)<br>Per 1,000 PM | Events / PM     | Rate (95% CI)<br>Per 1,000 PM |
| 2003         | 100 / 7937    | 12.6 (10.3,15.3)              | 383 / 29450   | 13.0 (11.7,14.4)              | 758 / 73198     | 10.3 (9.6,11.1)               | 1015 / 145079   | 7.0 (6.6,7.4)                 |
| 2004         | 88 / 7190     | 12.2 (9.8,15.1)               | 318 / 24618   | 12.9 (11.5,14.4)              | 536 / 53905     | 9.9 (9.1,10.8)                | 702 / 90489     | 7.8 (7.2,8.4)                 |
| 2005         | 81 / 7159     | 11.3 (9.0,14.0)               | 342 / 25403   | 13.5 (12.1,15.0)              | 615 / 56230     | 10.9 (10.1,11.8)              | 687 / 87281     | 7.9 (7.3,8.5)                 |
| 2006         | 100 / 8398    | 11.9 (9.7,14.5)               | 393 / 30372   | 12.9 (11.7,14.3)              | 724 / 67518     | 10.7 (10.0,11.5)              | 931 / 131198    | 7.1 (6.6,7.6)                 |
| 2007         | 117 / 9749    | 12.0 (9.9,14.4)               | 472 / 31417   | 15.0 (13.7,16.4)              | 838 / 76053     | 11.0 (10.3,11.8)              | 1475 / 185346   | 8.0 (7.6, 8.4)                |
| 2008         | 101 / 9537    | 10.6 (8.6,12.9)               | 467 / 34110   | 13.7 (12.5,15.0)              | 975 / 86138     | 11.3 (10.6,12.0)              | 2186 / 373933   | 8.0 (7.6, 8.3)                |
| 2009         | 136 / 10201   | 13.3 (11.2,15.6)              | 449 / 33289   | 13.5 (12.3,14.8)              | 1058 / 85250    | 12.4 (11.7,13.2)              | 2459 / 279528   | 8.8 (8.5,9.2)                 |
| 2010         | 124 / 9892    | 12.5 (10.4,14.9)              | 471 / 33035   | 14.3 (13.0,15.6)              | 1135 / 86780    | 13.1 (12.3,13.9)              | 2571 / 280187   | 9.2 (8.8,9.5)                 |
| 2011         | 125 / 10046   | 12.4 (10.4,14.8)              | 453 / 30644   | 14.8 (13.5,16.2)              | 1149 / 88900    | 12.9 (12.2,13.7)              | 2750 / 277845   | 9.9 (9.5,10.3)                |
| 2012         | 152 / 10567   | 14.4 (12.2,16.8)              | 527 / 31446   | 16.8 (15.4,18.2)              | 1366 / 92259    | 14.8 (14.0,15.6)              | 3087 / 290841   | 10.6 (10.2,11.0)              |
| 2013         | 139 / 10134   | 13.7 (11.5,16.2)              | 451 / 30151   | 15.0 (13.6,16.4)              | 1362 / 87972    | 15.5 (14.7,16.3)              | 3710 / 317758   | 11.7 (11.3,12.1)              |
| 2014         | 134 / 9540    | 14.0 (11.8,16.6)              | 439 / 28119   | 15.6 (14.2,17.1)              | 1339 / 84572    | 15.8 (15.0,16.7)              | 3743 / 301791   | 12.4 (12.0,12.8)              |
| 2015         | 140 / 10608   | 13.2 (11.1,15.6)              | 476 / 30195   | 15.8 (14.4,17.2)              | 1254 / 90657    | 13.8 (13.1,14.6)              | 4266 / 356224   | 12.0 (11.6,12.3)              |
| 2016         | 121 / 8834    | 13.7 (11.4,16.3)              | 464 / 30546   | 15.2 (13.8,16.6)              | 1397 / 92104    | 15.2 (14.4,16.0)              | 4244 / 368358   | 11.5 (11.1,11.9)              |
| 2017         | 165 / 9752    | 16.9 (14.5,19.7)              | 482 / 33549   | 14.4 (13.1,15.7)              | 1635 / 113643   | 14.4 (13.7,15.1)              | 5372 / 487850   | 11.0 (10.7,11.3)              |
| 2018         | 168 / 10434   | 16.1 (13.8,18.7)              | 505 / 36457   | 13.9 (12.7,15.1)              | 1663 / 116860   | 14.2 (13.6,14.9)              | 6394 / 554186   | 11.5 (11.3,11.8)              |
| 2019         | 147 / 8485    | 17.3 (14.7,20.3)              | 464 / 29471   | 15.7 (14.3,17.2)              | 1464 / 99370    | 14.7 (14.0,15.5)              | 6149 / 489732   | 12.6 (12.2,12.9)              |
| 2020         | 20 / 1141     | 17.5 (10.7,26.9)              | 89 / 3891     | 22.9 (18.4,28.1)              | 277 / 14064     | 19.7 (17.5,22.1)              | 1299 / 70089    | 18.5 (17.5,19.6)              |
| <b>Total</b> | 2158 / 159603 | 13.5 (13.0,14.1)              | 7645 / 526163 | 14.5 (14.2,14.9)              | 19545 / 1464573 | 13.3 (13.2,13.5)              | 53040 / 4987715 | 10.6 (10.5,10.7)              |

**Supplemental Table 7.** Crude rates of depression diagnosis following first stroke by race and ethnicity, 2003 - 2020

|              | Asian         |                               | Black          |                               | Hispanic      |                               | White           |                               |
|--------------|---------------|-------------------------------|----------------|-------------------------------|---------------|-------------------------------|-----------------|-------------------------------|
|              | Events / PM   | Rate (95% CI)<br>Per 1,000 PM | Events / PM    | Rate (95% CI)<br>Per 1,000 PM | Events / PM   | Rate (95% CI)<br>Per 1,000 PM | Events / PM     | Rate (95% CI)<br>Per 1,000 PM |
| 2003         | 35 / 3784     | 9.2 (6.5,12.8)                | 245 / 35794    | 6.8 (6.0,7.8)                 | 103 / 14810   | 7.0 (5.7,8.4)                 | 1873 / 201275   | 9.3 (8.9,9.7)                 |
| 2004         | 17 / 3248     | 5.2 (3.1,8.4)                 | 154 / 22404    | 6.9 (5.8,8.0)                 | 101 / 11354   | 8.9 (7.3,10.8)                | 1372 / 139196   | 9.9 (9.3,10.4)                |
| 2005         | 20 / 3247     | 6.2 (3.8,9.5)                 | 163 / 23360    | 7.0 (6.0,8.1)                 | 97 / 11704    | 8.3 (6.7,10.1)                | 1445 / 137763   | 10.5 (10.0,11.0)              |
| 2006         | 26 / 5104     | 5.1 (3.3,7.4)                 | 194 / 32725    | 5.9 (5.1,6.8)                 | 133 / 17733   | 7.5 (6.3,8.9)                 | 1795 / 181923   | 9.9 (9.4,10.3)                |
| 2007         | 57 / 7524     | 7.6 (5.7,9.8)                 | 295 / 39009    | 7.6 (6.7,8.5)                 | 218 / 27526   | 7.9 (6.9,9.0)                 | 2332 / 228506   | 10.3 (9.8,10.6)               |
| 2008         | 68 / 11721    | 5.8 (4.5,7.3)                 | 417 / 52716    | 7.9 (7.2,8.7)                 | 293 / 44427   | 6.6 (5.8,7.4)                 | 2951 / 294856   | 10.0 (9.7,10.4)               |
| 2009         | 74 / 12189    | 6.1 (4.8,7.6)                 | 464 / 54855    | 8.5 (7.7,9.3)                 | 408 / 46785   | 8.7 (7.9,9.6)                 | 3156 / 294440   | 10.7 (10.3,11.1)              |
| 2010         | 82 / 11576    | 7.1 (5.7,8.9)                 | 503 / 54851    | 9.2 (8.4,10.0)                | 392 / 44098   | 8.9 (8.0,9.8)                 | 3324 / 299469   | 11.1 (10.7,11.5)              |
| 2011         | 77 / 12322    | 6.2 (4.9,7.8)                 | 526 / 55561    | 9.5 (8.7,10.3)                | 421 / 40030   | 10.5 (9.5,11.6)               | 3453 / 299522   | 11.5 (11.1,11.9)              |
| 2012         | 78 / 12822    | 6.1 (4.8,7.6)                 | 615 / 59585    | 10.3 (9.5,11.2)               | 430 / 41407   | 10.4 (9.5,11.4)               | 4009 / 311300   | 12.9 (12.5,13.3)              |
| 2013         | 120 / 16180   | 7.4 (6.2,8.9)                 | 673 / 61705    | 10.9 (10.1,11.8)              | 565 / 46350   | 12.2 (11.2,13.2)              | 4304 / 321781   | 13.4 (13.0,13.8)              |
| 2014         | 124 / 15362   | 8.1 (6.7,9.6)                 | 657 / 55242    | 11.9 (11.0,12.8)              | 590 / 48828   | 12.1 (11.1,13.1)              | 4284 / 304590   | 14.1 (13.6,14.5)              |
| 2015         | 163 / 17755   | 9.2 (7.8,10.7)                | 724 / 65221    | 11.1 (10.3,11.9)              | 655 / 54970   | 11.9 (11.0,12.9)              | 4594 / 349738   | 13.1 (12.8,13.5)              |
| 2016         | 153 / 17292   | 8.8 (7.5,10.4)                | 707 / 67787    | 10.4 (9.7,11.2)               | 647 / 56066   | 11.5 (10.7,12.5)              | 4719 / 358697   | 13.2 (12.8,13.5)              |
| 2017         | 147 / 20726   | 7.1 (6.0,8.3)                 | 1100 / 104640  | 10.5 (9.9,11.1)               | 895 / 81161   | 11.0 (10.3,11.7)              | 5512 / 438267   | 12.6 (12.2,12.9)              |
| 2018         | 194 / 24009   | 8.1 (7.0,9.3)                 | 1141 / 112470  | 10.1 (9.6,10.7)               | 1020 / 90564  | 11.2 (10.6,12.0)              | 6375 / 490894   | 13.0 (12.7,13.3)              |
| 2019         | 166 / 21186   | 7.8 (6.7,9.1)                 | 1122 / 96388   | 10.1 (9.6,10.7)               | 895 / 76002   | 11.8 (11.0,12.6)              | 6041 / 433482   | 13.9 (13.6,14.3)              |
| 2020         | 37 / 2868     | 12.9 (9.1,17.7)               | 225 / 13705    | 16.4 (14.4,18.7)              | 168 / 10244   | 16.4 (14.0,19.1)              | 1255 / 62368    | 20.1 (19.0,21.3)              |
| <b>Total</b> | 1638 / 218815 | 7.5 (7.1,7.9)                 | 9925 / 1008107 | 9.8 (9.7,10.0)                | 8031 / 764054 | 10.5 (10.3,10.7)              | 62794 / 5148067 | 12.2 (12.1,12.3)              |

**Supplemental Table 8.** Crude rates of depression diagnosis following first stroke by U.S. Census Region, 2003 - 2020

|              | Midwest                |                               | Northeast             |                               | South                  |                               | West                   |                               |
|--------------|------------------------|-------------------------------|-----------------------|-------------------------------|------------------------|-------------------------------|------------------------|-------------------------------|
|              | Events / PM            | Rate (95% CI)<br>Per 1,000 PM | Events / PM           | Rate (95% CI)<br>Per 1,000 PM | Events / PM            | Rate (95% CI)<br>Per 1,000 PM | Events / PM            | Rate (95% CI)<br>Per 1,000 PM |
| 2003         | 1056 / 102223          | 10.3 (9.7,11.0)               | 282 / 27233           | 10.4 (9.2,11.6)               | 775 / 110442           | 7.0 (6.5,7.5)                 | 143 / 15765            | 9.1 (7.7,10.7)                |
| 2004         | 704 / 65424            | 10.8 (10.0,11.6)              | 204 / 19686           | 10.4 (9.0,11.9)               | 631 / 78639            | 8.0 (7.4,8.7)                 | 105 / 12452            | 8.4 (6.9,10.2)                |
| 2005         | 714 / 61940            | 11.5 (10.7,12.4)              | 199 / 19641           | 10.1 (8.8,11.6)               | 677 / 79654            | 8.5 (7.9,9.2)                 | 135 / 14838            | 9.1 (7.7,10.7)                |
| 2006         | 743 / 65823            | 11.7 (10.9,12.5)              | 217 / 19683           | 11.0 (9.6,12.6)               | 887 / 104508           | 8.5 (7.9,9.1)                 | 301 / 49164            | 6.1 (5.5,6.9)                 |
| 2007         | 769 / 65823            | 11.7 (10.9,12.5)              | 422 / 26389           | 16.0 (14.5,17.6)              | 1199 / 127090          | 9.4 (8.9,10.0)                | 512 / 83263            | 6.1 (5.6,6.7)                 |
| 2008         | 812 / 65484            | 12.4 (11.6,13.3)              | 474 / 29659           | 16.0 (14.9,17.5)              | 1368 / 157396          | 8.7 (8.2,9.2)                 | 1075 / 151180          | 7.1 (6.6,7.4)                 |
| 2009         | 930 / 67091            | 13.9 (13.0,14.8)              | 503 / 31115           | 16.1 (14.8,17.6)              | 1473 / 160345          | 9.2 (8.7,9.7)                 | 1196 / 149716          | 8.0 (7.5,8.5)                 |
| 2010         | 1009 / 78524           | 12.9 (12.1,13.7)              | 482 / 30337           | 15.9 (14.5,17.4)              | 1691 / 167186          | 10.1 (9.6,10.6)               | 1119 / 133848          | 8.4 (7.9,8.9)                 |
| 2011         | 1114 / 86472           | 12.9 (12.1,13.7)              | 510 / 31087           | 16.5 (15.0,17.9)              | 1755 / 170825          | 10.3 (9.8,10.8)               | 1098 / 119051          | 9.2 (8.7,9.8)                 |
| 2012         | 1307 / 92575           | 14.1 (13.4,14.9)              | 693 / 42235           | 16.4 (15.2,17.7)              | 2078 / 177938          | 11.7 (11.2,12.2)              | 1054 / 112365          | 9.4 (8.8,10.0)                |
| 2013         | 1330 / 97754           | 13.6 (12.9,14.4)              | 1049 / 66079          | 15.9 (14.9,16.9)              | 2146 / 169960          | 12.6 (12.9,14.0)              | 1137 / 112222          | 10.1 (9.6,10.7)               |
| 2014         | 1357 / 94967           | 14.3 (13.5,15.1)              | 1063 / 63477          | 16.7 (15.8,17.8)              | 2090 / 156143          | 13.4 (12.8,14.0)              | 1145 / 109435          | 10.4 (9.9,11.1)               |
| 2015         | 1414 / 113882          | 12.4 (11.8,13.1)              | 1135 / 67252          | 16.9 (15.9, 17.9)             | 2405 / 193371          | 12.4 (11.9,12.9)              | 1182 / 113180          | 10.4 (9.9,11.1)               |
| 2016         | 1525 / 116219          | 13.1 (12.5,13.8)              | 1020 / 67252          | 15.3 (14.4,16.3)              | 2542 / 203472          | 12.5 (12.0,13.0)              | 1139 / 113449          | 10.0 (9.5,10.6)               |
| 2017         | 1739 / 135634          | 12.8 (12.2,13.4)              | 1081 / 74730          | 14.5 (13.6,15.3)              | 3538 / 297014          | 11.9 (11.5,12.3)              | 1396 / 137416          | 9.4 (8.9,10.0)                |
| 2018         | 1893 / 142196          | 13.3 (12.7,13.9)              | 1507 / 90259          | 15.7 (15.9,17.6)              | 3956 / 338861          | 11.7 (14.2,15.0)              | 1374 / 146620          | 9.4 (8.8,9.9)                 |
| 2019         | 1736 / 124793          | 13.9 (13.3,14.6)              | 1445 / 83439          | 17.3 (16.4,18.2)              | 3808 / 291148          | 13.1 (12.7,13.5)              | 1235 / 127679          | 9.7 (9.1,10.2)                |
| 2020         | 385 / 18363            | 21.0 (18.9,23.1)              | 297 / 11504           | 25.8 (23.0,28.9)              | 764 / 41612            | 18.4 (17.1,20.0)              | 239 / 17706            | 13.5 (11.9,15.3)              |
| <b>Total</b> | <b>20537 / 1593493</b> | <b>12.9 (12.7,13.1)</b>       | <b>12583 / 800508</b> | <b>15.7 (15.4,16.0)</b>       | <b>33783 / 3025603</b> | <b>11.1 (11.0,11.3)</b>       | <b>15485 / 1719350</b> | <b>9.0 (8.9,9.1)</b>          |



**Supplemental Table 9.** Crude rates of depression diagnosis among individuals with and without a diagnosis of depression in the year prior to first stroke, 2003–2020

|              | Prior Depression Dx |                               | No Prior Depression Dx |                               |
|--------------|---------------------|-------------------------------|------------------------|-------------------------------|
|              | Events / PM         | Rate (95% CI)<br>Per 1,000 PM | Events / PM            | Rate (95% CI)<br>Per 1,000 PM |
| 2003         | 740 / 10488         | 70.55 (65.73 – 75.63)         | 1516 / 245175          | 6.18 (6.88 – 6.50)            |
| 2004         | 760 / 17587         | 43.21 (40.26 – 46.32)         | 884 / 158614           | 5.57 (5.21 – 5.95)            |
| 2005         | 828 / 20150         | 41.09 (38.39 – 43.92)         | 897 / 155923           | 5.75 (5.38 – 6.14)            |
| 2006         | 1052 / 28795        | 36.53 (34.40 – 38.77)         | 1096 / 208690          | 5.25 (4.95 – 5.57)            |
| 2007         | 1561 / 40580        | 38.47 (36.62 – 40.38)         | 1341 / 261985          | 5.12 (4.85 – 5.40)            |
| 2008         | 1879 / 50629        | 37.11 (35.48 – 38.80)         | 1850 / 353090          | 5.24 (5.00 – 5.48)            |
| 2009         | 2219 / 61794        | 35.91 (34.46 – 37.41)         | 1883 / 346474          | 5.44 (4.19 – 5.69)            |
| 2010         | 2436 / 68766        | 35.42 (34.06 – 36.83)         | 1865 / 341128          | 5.47 (5.22 – 5.72)            |
| 2011         | 2582 / 71920        | 35.90 (34.55 – 37.29)         | 1895 / 335515          | 5.65 (5.40 – 5.91)            |
| 2012         | 2976 / 82069        | 36.26 (34.99 – 37.56)         | 2156 / 343045          | 6.29 (6.02 – 6.56)            |
| 2013         | 3335 / 87018        | 38.33 (37.06 – 39.62)         | 2327 / 358998          | 6.48 (6.22 – 6.75)            |
| 2014         | 3392 / 87825        | 38.62 (37.36 – 39.92)         | 2263 / 336196          | 6.73 (6.46 – 7.01)            |
| 2015         | 3651 / 101814       | 35.86 (34.73 – 37.02)         | 2485 / 385870          | 6.44 (6.19 – 6.70)            |
| 2016         | 3666 / 104795       | 34.98 (33.88 – 36.11)         | 2560 / 395047          | 6.48 (6.23 – 6.74)            |
| 2017         | 4450 / 129806       | 34.28 (33.30 – 35.29)         | 3204 / 514988          | 6.22 (6.01 – 6.44)            |
| 2018         | 5176 / 147124       | 35.18 (34.25 – 36.14)         | 3554 / 570812          | 6.23 (6.02 – 6.43)            |
| 2019         | 5019 / 136279       | 36.83 (35.84 – 37.84)         | 3205 / 490778          | 6.53 (6.31 – 6.76)            |
| 2020         | 1065 / 21095        | 50.49 (47.57 – 53.53)         | 620 / 68090            | 9.11 (8.41 – 9.85)            |
| <b>Total</b> | 46787 / 1268535     | 36.88 (36.56 – 37.21)         | 35601 / 5870419        | 6.06 (6.00 – 6.13)            |

**Supplemental Table 10.** Hazard ratios (HR) for demographic characteristics and post-stroke depression among individuals with and without a diagnosis of depression in the year prior to first stroke

|                           | <b>Prior Depression Dx</b><br>HR (95% CI) | <b>No Prior Depression Dx</b><br>HR (95% CI) |
|---------------------------|-------------------------------------------|----------------------------------------------|
| <b>Sex</b>                |                                           |                                              |
| Male                      | 1 (Ref)                                   | 1 (Ref)                                      |
| Female                    | 1.12 (1.10 – 1.14)                        | 1.29 (1.27 – 1.32)                           |
| <b>Age Group</b>          |                                           |                                              |
| 18 to 34                  | 1 (Ref)                                   | 1 (Ref)                                      |
| 35 to 49                  | 1.00 (0.94 – 1.07)                        | 1.05 (0.98 – 1.13)                           |
| 50 to 64                  | 0.96 (0.90 – 1.01)                        | 0.91 (0.86 – 0.97)                           |
| 65 and older              | 0.79 (0.74 – 0.83)                        | 0.80 (0.75 – 0.85)                           |
| <b>Race and Ethnicity</b> |                                           |                                              |
| White                     | 1 (Ref)                                   | 1 (Ref)                                      |
| Asian                     | 0.95 (0.89 – 1.02)                        | 0.68 (0.63 – 0.73)                           |
| Black                     | 0.91 (0.89 – 0.94)                        | 0.70 (0.78 – 0.83)                           |
| Hispanic                  | 0.93 (0.90 – 0.96)                        | 0.90 (0.87 – 0.94)                           |
| <b>Region</b>             |                                           |                                              |
| Midwest                   | 1 (Ref)                                   | 1 (Ref)                                      |
| Northeast                 | 1.33 (1.29 – 1.37)                        | 1.17 (1.13 – 1.21)                           |
| South                     | 0.92 (0.90 – 0.94)                        | 0.85 (0.83 – 0.88)                           |
| West                      | 0.77 (0.75 – 0.80)                        | 0.69 (0.67 – 0.71)                           |

**Supplemental Table 11.** Hazard ratios (HR) for demographic characteristics and post-stroke depression with alternative follow-up duration

|                           | <b>Six Months</b><br>HR (95% CI) | <b>One Year</b><br>HR (95% CI) | <b>Five Years</b><br>HR (95% CI) |
|---------------------------|----------------------------------|--------------------------------|----------------------------------|
| <b>Sex</b>                |                                  |                                |                                  |
| Male                      | 1 (Ref)                          | 1 (Ref)                        | 1 (Ref)                          |
| Female                    | 1.51 (1.49 – 1.54)               | 1.53 (1.51 – 1.55)             | 1.56 (1.55 – 1.58)               |
| <b>Age Group</b>          |                                  |                                |                                  |
| 18 to 34                  | 1 (Ref)                          | 1 (Ref)                        | 1 (Ref)                          |
| 35 to 49                  | 1.08 (1.02 – 1.14)               | 1.10 (1.04 – 1.15)             | 1.09 (1.05 – 1.14)               |
| 50 to 64                  | 0.98 (0.94 – 1.04)               | 1.01 (0.96 – 1.05)             | 1.02 (0.99 – 1.06)               |
| 65 and older              | 0.73 (0.69 – 0.76)               | 0.75 (0.72 – 0.79)             | 0.80 (0.78 – 0.83)               |
| <b>Race and Ethnicity</b> |                                  |                                |                                  |
| White                     | 1 (Ref)                          | 1 (Ref)                        | 1 (Ref)                          |
| Asian                     | 0.64 (0.61 – 0.68)               | 0.63 (0.60 – 0.66)             | 0.60 (0.57 – 0.62)               |
| Black                     | 0.76 (0.74 – 0.77)               | 0.76 (0.74 – 0.78)             | 0.77 (0.75 – 0.78)               |
| Hispanic                  | 0.86 (0.84 – 0.88)               | 0.88 (0.86 – 0.90)             | 0.89 (0.88 – 0.91)               |
| <b>Region</b>             |                                  |                                |                                  |
| Midwest                   | 1 (Ref)                          | 1 (Ref)                        | 1 (Ref)                          |
| Northeast                 | 1.27 (1.24 – 1.31)               | 1.22 (1.19 – 1.25)             | 1.16 (1.14 – 1.18)               |
| South                     | 0.86 (0.84 – 0.88)               | 0.87 (0.86 – 0.89)             | 0.90 (0.89 – 0.91)               |
| West                      | 0.70 (0.68 – 0.72)               | 0.73 (0.71 – 0.74)             | 0.77 (0.76 – 0.78)               |

**Supplemental Table 12.** Hazard ratios (HR) using alternative outcome definitions for post-stroke depression <sup>1</sup>

|                           | <b>Main Outcome Definition</b><br>HR (95% CI) | <b>Alternative 1</b><br>HR (95% CI) | <b>Alternative 2</b><br>HR (95% CI) | <b>Alternative 3</b><br>HR (95% CI) |
|---------------------------|-----------------------------------------------|-------------------------------------|-------------------------------------|-------------------------------------|
| <b>Sex</b>                |                                               |                                     |                                     |                                     |
| Male                      | 1 (Ref)                                       | 1 (Ref)                             | 1 (Ref)                             | 1 (Ref)                             |
| Female                    | 1.53 (1.51 – 1.55)                            | 1.60 (1.58– 1.63)                   | 1.63 (1.60 – 1.66)                  | 1.52 (1.50 – 1.54)                  |
| <b>Age Group</b>          |                                               |                                     |                                     |                                     |
| 18 to 34                  | 1 (Ref)                                       | 1 (Ref)                             | 1 (Ref)                             | 1 (Ref)                             |
| 35 to 49                  | 1.10 (1.04 – 1.15)                            | 1.15 (1.09 – 1.22)                  | 1.10 (1.03 – 1.17)                  | 1.14 (1.09 – 1.18)                  |
| 50 to 64                  | 1.01 (0.96 – 1.05)                            | 1.17 (1.11 – 1.23)                  | 1.08 (1.02 – 1.15)                  | 1.07 (1.04 – 1.11)                  |
| 65 and older              | 0.75 (0.72 – 0.79)                            | 0.88 (0.84 – 0.92)                  | 0.74 (0.71 – 0.80)                  | 0.84 (0.81 – 0.87)                  |
| <b>Race and Ethnicity</b> |                                               |                                     |                                     |                                     |
| White                     | 1 (Ref)                                       | 1 (Ref)                             | 1 (Ref)                             | 1 (Ref)                             |
| Asian                     | 0.63 (0.60 – 0.66)                            | 0.63 (0.60 – 0.67)                  | 0.60 (0.56 – 0.64)                  | 0.64 (0.62 – 0.67)                  |
| Black                     | 0.76 (0.74 – 0.78)                            | 0.76 (0.74 – 0.77)                  | 0.75 (0.73 – 0.78)                  | 0.77 (0.76 – 0.78)                  |
| Hispanic                  | 0.88 (0.86 – 0.90)                            | 0.99 (0.97 – 1.01)                  | 0.93 (0.90 – 0.96)                  | 0.84 (0.81 – 0.87)                  |
| <b>Region</b>             |                                               |                                     |                                     |                                     |
| Midwest                   | 1 (Ref)                                       | 1 (Ref)                             | 1 (Ref)                             | 1 (Ref)                             |
| Northeast                 | 1.22 (1.19 – 1.25)                            | 1.09 (1.05 – 1.11)                  | 1.18 (1.14 – 1.22)                  | 1.13 (1.05 – 1.15)                  |
| South                     | 0.87 (0.86 – 0.89)                            | 0.98 (0.96 – 0.99)                  | 0.97 (0.95 – 0.99)                  | 0.88 (0.87 – 0.89)                  |
| West                      | 0.73 (0.71 – 0.74)                            | 0.94 (0.92 – 0.96)                  | 0.85 (0.83 – 0.88)                  | 0.79 (0.77 – 0.80)                  |

1. **Alternative 1:** First diagnosis of major depressive disorder in 365 days; **Alternative 2:** Second diagnosis of major depressive disorder in 365 days; **Alternative 3:** First depression-related diagnosis in 365 days; **Main Outcome Definition:** Second depression-related diagnosis in 365 days.

**Supplemental Table 13.** Prescribed antidepressants among individuals with post-stroke depression overall and by stroke type, 2003 – 2020

|              | All Stroke             |                               | IS                     |                               | ICH                  |                               | SAH                  |                               |
|--------------|------------------------|-------------------------------|------------------------|-------------------------------|----------------------|-------------------------------|----------------------|-------------------------------|
|              | Events / PM            | Rate (95% CI)<br>Per 1,000 PM | Events / PM            | Rate (95% CI)<br>Per 1,000 PM | Events / PM          | Rate (95% CI)<br>Per 1,000 PM | Events / PM          | Rate (95% CI)<br>Per 1,000 PM |
| 2003         | 13223 / 21901          | 603.8 (597.2, 610.2)          | 11971 / 19832          | 603.6 (596.8,610.4)           | 703 / 1210           | 581.0 (552.6,609.0)           | 550 / 859            | 640.3 (607.2,672.4)           |
| 2004         | 9387 / 15810           | 593.8 (586.0, 601.4)          | 8215 / 13783           | 596.0 (587.8,604.2)           | 738 / 1248           | 591.3 (563.5,618.8)           | 434 / 779            | 557.1 (521.4,592.4)           |
| 2005         | 10049 / 16361          | 614.2 (606.7, 621.7)          | 8708 / 14026           | 620.8 (612.8,628.9)           | 923 / 1546           | 597.0 (572.1,621.6)           | 418 / 790            | 529.1 (493.6,564.4)           |
| 2006         | 14076 / 20664          | 681.2 (674.8, 687.5)          | 12269 / 17938          | 684.0 (677.1,690.8)           | 1109 / 1711          | 648.2 (625.0,670.8)           | 698 / 1015           | 687.7 (658.2,716.1)           |
| 2007         | 19932 / 28266          | 705.2 (699.8, 710.5)          | 17622 / 24615          | 715.9 (710.2,721.5)           | 1285 / 2121          | 605.8 (584.7,626.7)           | 1025 / 1530          | 667.0 (645.7,693.5)           |
| 2008         | 25000 / 36713          | 681.0 (676.1, 685.7)          | 21951 / 32187          | 681.2 (676.8,687.1)           | 1985 / 2858          | 694.5 (677.3,711.4)           | 1065 / 1669          | 638.1 (614.5,661.2)           |
| 2009         | 29212 / 39984          | 730.6 (726.2, 734.9)          | 25778 / 34861          | 739.5 (734.8,744.1)           | 2051 / 3072          | 667.6 (650.7,684.3)           | 1383 / 2052          | 674.0 (653.2,694.2)           |
| 2010         | 30949 / 41703          | 742.1 (737.9, 746.3)          | 27303 / 36421          | 749.6 (745.2,754.1)           | 2182 / 3262          | 668.9 (652.5,685.1)           | 1464 / 2020          | 724.8 (704.7,744.1)           |
| 2011         | 34825 / 43911          | 793.1 (789.3, 796.9)          | 30591 / 38119          | 802.5 (798.5,806.5)           | 2662 / 3673          | 724.7 (710.0,739.1)           | 1571 / 2119          | 741.4 (722.2,760.0)           |
| 2012         | 42246 / 50578          | 835.3 (832.0, 838.5)          | 36469 / 43451          | 839.3 (835.8,842.8)           | 3671 / 4529          | 810.6 (798.8,821.9)           | 2106 / 2598          | 810.6 (795.0,825.5)           |
| 2013         | 45857 / 53156          | 862.7 (859.7, 865.6)          | 40185 / 46011          | 873.4 (870.3,876.4)           | 3496 / 4443          | 786.9 (774.5,798.8)           | 2176 / 2702          | 805.0 (789.5,819.7)           |
| 2014         | 45936 / 54663          | 858.6 (855.7, 861.6)          | 40934 / 46763          | 875.4 (872.3,878.3)           | 3475 / 4750          | 731.6 (718.7,744.1)           | 2526 / 3150          | 801.9 (787.6,815.7)           |
| 2015         | 52406 / 60366          | 868.1 (865.4, 870.8)          | 45923 / 52190          | 880.0 (877.1,882.7)           | 3681 / 4865          | 756.6 (744.3,768.6)           | 2802 / 3312          | 846.0 (833.3,858.1)           |
| 2016         | 54055 / 60477          | 893.8 (891.3, 896.3)          | 46614 / 51598          | 903.4 (900.8,905.9)           | 4347 / 5181          | 839.0 (828.7,848.9)           | 3094 / 3699          | 836.4 (824.1,848.2)           |
| 2017         | 67502 / 74981          | 900.3 (898.1, 902.4)          | 59549 / 65377          | 910.9 (908.6,913.0)           | 4672 / 5578          | 837.6 (827.6,847.2)           | 3281 / 4026          | 815.0 (802.6,826.8)           |
| 2018         | 71880 / 85522          | 840.5 (838.0, 842.9)          | 62934 / 74032          | 850.1 (847.5,852.7)           | 5223 / 6672          | 782.8 (772.7,792.7)           | 3722 / 4818          | 772.5 (760.4,784.3)           |
| 2019         | 47722 / 58128          | 821.0 (817.8, 824.1)          | 41199 / 49589          | 830.8 (827.5,834.1)           | 3548 / 4805          | 738.4 (725.7,750.8)           | 2974 / 3735          | 796.3 (783.0,809.1)           |
| 2020         | 3215 / 3785            | 849.5 (837.6, 860.7)          | 2764 / 3215            | 859.7 (847.2,871.5)           | 249 / 312            | 798.1 (749.2,841.2)           | 203 / 258            | 786.8 (731.7,835.2)           |
| <b>Total</b> | <b>618747 / 766970</b> | <b>806.7 (805.9, 807.6)</b>   | <b>540981 / 664007</b> | <b>814.7 (813.8,815.7)</b>    | <b>46000 / 61834</b> | <b>743.9 (740.4,747.4)</b>    | <b>31493 / 41128</b> | <b>765.7 (761.6,759.8)</b>    |

**Supplemental Table 14.** Crude rates of prescribed antidepressants by drug class, 2003 - 2020

|              | SSRI            |                               | SNRI            |                               | TCA            |                               | MAOI         |                               | Atypical        |                               |
|--------------|-----------------|-------------------------------|-----------------|-------------------------------|----------------|-------------------------------|--------------|-------------------------------|-----------------|-------------------------------|
|              | Events / PM     | Rate (95% CI)<br>Per 1,000 PM | Events / PM     | Rate (95% CI)<br>Per 1,000 PM | Events / PM    | Rate (95% CI)<br>Per 1,000 PM | Events / PM  | Rate (95% CI)<br>Per 1,000 PM | Events / PM     | Rate (95% CI)<br>Per 1,000 PM |
| 2003         | 7320 / 21901    | 334.2 (328.0,340.5)           | 1687 / 21901    | 77.0 (73.5,80.6)              | 937 / 21901    | 42.8 (40.1, 45.5)             | 42 / 21901   | 0.2 (0.1,0.3)                 | 3237 / 21901    | 147.8 (143.1,152.6)           |
| 2004         | 5072 / 15810    | 320.8 (313.5,328.1)           | 1419 / 15810    | 89.7 (85.3,94.3)              | 620 / 15810    | 39.2 (36.2,42.4)              | 16 / 15810   | 0.1 (0.1, 0.2)                | 2260 / 15810    | 143.0 (137.5,148.5)           |
| 2005         | 5451 / 16361    | 333.2 (325.9,340.5)           | 1665 / 16361    | 101.8 (97.2,106.5)            | 673 / 16361    | 41.1 (38.1,44.3)              | 6 / 16361    | 0.4 (0.1,0.7)                 | 2254 / 16361    | 137.8 (132.5,143.1)           |
| 2006         | 7377 / 20664    | 357.0 (350.5,363.6)           | 2736 / 20664    | 132.4 (127.8,137.1)           | 621 / 20664    | 30.1 (27.8,32.5)              | 13 / 20664   | 0.6, 0.3,1.1)                 | 3328 / 20664    | 161.1 (156.1,166.1)           |
| 2007         | 10585 / 28266   | 374.4 (368.8,380.2)           | 3541 / 28266    | 125.3 (121.4,129.2)           | 710 / 28266    | 25.1 (23.3,27.0)              | 38 / 28266   | 0.1 (0.1,0.2)                 | 5058 / 28266    | 179.0 (174.4,183.5)           |
| 2008         | 13853 / 36713   | 377.3 (372.5,382.5)           | 3843 / 36713    | 104.7 (101.6,107.9)           | 1066 / 36713   | 29.0 (27.3,30.8)              | 44 / 36713   | 1.2 (0.9,1.6)                 | 6195 / 36713    | 168.7 (164.9,172.6)           |
| 2009         | 15557 / 39984   | 389.1 (384.3,393.9)           | 4783 / 39984    | 119.6 (116.5,122.8)           | 1236 / 39984   | 30.9 (29.3,32.7)              | 14 / 39984   | 0.4 (0.2,0.6)                 | 7623 / 39984    | 190.6 (186.8,194.5)           |
| 2010         | 16930 / 41703   | 406.0 (401.2,410.7)           | 4754 / 41703    | 114.0 (111.0,117.1)           | 1311 / 41703   | 31.4 (29.8,33.2)              | 24 / 41703   | 0.6 (0.4,0.9)                 | 7931 / 41703    | 190.2 (186.4,194.0)           |
| 2011         | 17727 / 43911   | 403.7 (399.1,408.3)           | 5937 / 43911    | 135.2 (132.0,138.4)           | 1783 / 43911   | 40.6 (38.8,42.5)              | 14 / 43911   | 0.3 (0.2,0.5)                 | 9364 / 43911    | 213.3 (209.4,217.1)           |
| 2012         | 21656 / 50578   | 428.2 (423.9,432.5)           | 7228 / 50578    | 142.9 (139.9,146.0)           | 1770 / 50578   | 35.0 (33.4,36.6)              | 75 / 50578   | 1.5 (1.2,1.9)                 | 11516 / 50578   | 227.7 (224.0,231.4)           |
| 2013         | 23170 / 53156   | 435.9 (431.7,440.1)           | 7546 / 53156    | 142.0 (139.0,145.0)           | 2041 / 53156   | 38.4 (36.8,40.1)              | 28 / 53156   | 0.5 (0.4,0.8)                 | 13072 / 53156   | 245.9 (242.3,249.6)           |
| 2014         | 23588 / 54663   | 431.5 (427.4,435.7)           | 7751 / 54663    | 141.8 (138.9,144.7)           | 1615 / 54663   | 29.5 (28.1,31.0)              | 11 / 54663   | 0.2 (0.1,0.4)                 | 13971 / 54663   | 255.6 (251.9,259.3)           |
| 2015         | 26411 / 60366   | 437.5 (433.6,441.5)           | 8656 / 60366    | 143.4 (140.6,146.2)           | 1804 / 60366   | 29.9 (28.5,31.3)              | 30 / 60366   | 0.5 (0.3,0.7)                 | 15504 / 60366   | 256.8 (253.4,260.3)           |
| 2016         | 26748 / 60477   | 442.3 (438.3,446.3)           | 9253 / 60477    | 153.0 (150.1,155.9)           | 1838 / 60477   | 30.4 (29.0,31.8)              | 74 / 60477   | 1.2 (1.0,1.5)                 | 16143 / 60477   | 266.9 (263.4,270.5)           |
| 2017         | 32640 / 74981   | 435.3 (431.8,438.9)           | 11489 / 74981   | 153.2 (150.7,155.8)           | 2390 / 74981   | 31.9 (30.6,33.2)              | 37 / 74981   | 0.5 (0.3,0.7)                 | 20946 / 74981   | 279.3 (276.1,282.6)           |
| 2018         | 34214 / 85522   | 400.1 (396.8,403.4)           | 12341 / 85522   | 144.3 (142.0,146.7)           | 2446 / 85522   | 28.6 (27.5,29.7)              | 26 / 85522   | 0.5 (0.4,0.7)                 | 22834 / 85522   | 267.0 (264.0,270.0)           |
| 2019         | 22116 / 58128   | 380.5 (376.5,384.4)           | 8670 / 58128    | 149.1 (146.3,152.1)           | 1698 / 58128   | 29.2 (27.9,30.6)              | 26 / 58128   | 0.4 (0.3, 0.7)                | 15212 / 58128   | 261.7 (258.1, 265.3)          |
| 2020         | 1451 / 3785     | 383.3 (367.8,399.1)           | 622 / 3785      | 164.4 (152.7,176.5)           | 96 / 3785      | 25.3 (20.6,30.9)              | 1 / 3785     | 0.1 (0.0, 0.1)                | 1046 / 3785     | 276.3 (262.2,291.0)           |
| <b>Total</b> | 311865 / 766970 | 406.6 (405.5,407.7)           | 103921 / 766970 | 135.5 (134.7,136.3)           | 24655 / 766970 | 32.1 (31.8,32.5)              | 538 / 766970 | 0.7 (0.6, 0.8)                | 177494 / 766970 | 231.4 (230.4,232.4)           |

**Supplemental Table 15.** Crude rates of prescribed antidepressants by gender, 2003 - 2020

|              | <b>Women</b>    |                               | <b>Men</b>      |                               |
|--------------|-----------------|-------------------------------|-----------------|-------------------------------|
|              | Events / PM     | Rate (95% CI)<br>Per 1,000 PM | Events / PM     | Rate (95% CI)<br>Per 1,000 PM |
| 2003         | 8319 / 13238    | 628.4 (620.1,636.7)           | 4904 / 8663     | 566.0 (555.6,576.6)           |
| 2004         | 6098 / 9809     | 621.7 (612.0,631.3)           | 3289 / 6002     | 548.0 (535.3,560.6)           |
| 2005         | 6623 / 10011    | 661.6 (652.2,670.8)           | 3426 / 6350     | 539.5 (527.2,551.8)           |
| 2006         | 9160 / 12802    | 715.5 (707.6,723.3)           | 4916 / 7861     | 625.3 (614.6,636.1)           |
| 2007         | 13490 / 18132   | 744.0 (737.6,750.3)           | 6442 / 10133    | 635.7 (626.3,645.1)           |
| 2008         | 16894 / 23280   | 725.7 (719.9,731.4)           | 8106 / 13434    | 603.4 (595.1,611.7)           |
| 2009         | 19955 / 25752   | 774.9 (769.7,780.0)           | 9258 / 14232    | 650.4 (642.6,658.3)           |
| 2010         | 20961 / 26307   | 796.8 (791.9,801.6)           | 9989 / 15396    | 648.8 (641.2,656.3)           |
| 2011         | 23319 / 27971   | 833.7 (829.3,838.0)           | 11506 / 15939   | 721.8 (714.8,728.8)           |
| 2012         | 28090 / 32089   | 875.4 (871.7,879.0)           | 14156 / 18489   | 765.7 (759.5,771.7)           |
| 2013         | 30285 / 33398   | 906.8 (903.6,909.9)           | 15572 / 19758   | 788.1 (782.4,793.8)           |
| 2014         | 31985 / 34269   | 933.3 (930.7,936.0)           | 14951 / 20393   | 733.1 (727.0,739.2)           |
| 2015         | 35997 / 38438   | 936.5 (932.4,937.3)           | 16409 / 21928   | 748.3 (741.0,752.6)           |
| 2016         | 36279 / 38505   | 942.2 (939.8,944.5)           | 17776 / 21972   | 809.0 (803.8,814.2)           |
| 2017         | 45461 / 47538   | 956.3 (954.4,958.1)           | 22041 / 27443   | 803.2 (798.4,807.8)           |
| 2018         | 48015 / 54384   | 882.9 (880.2,885.6)           | 23865 / 31138   | 766.4 (761.7,771.1)           |
| 2019         | 31849 / 37452   | 850.4 (846.7,854.0)           | 15873 / 20677   | 767.7 (761.8,773.4)           |
| 2020         | 2185 / 2407     | 907.9 (895.5,919.0)           | 1030 / 1378     | 747.5 (723.6,770.2)           |
| <b>Total</b> | 414966 / 485782 | 854.2 (853.2,855.2)           | 203508 / 281188 | 723.7 (722.1,725.4)           |

**Supplemental Table 16.** Crude rates of prescribed antidepressants by age category, 2003 - 2020

|              | 18 – 34 Years |                               | 35 – 49 Years |                               | 50 – 64 Years   |                               | 65 and Older    |                               |
|--------------|---------------|-------------------------------|---------------|-------------------------------|-----------------|-------------------------------|-----------------|-------------------------------|
|              | Events / PM   | Rate (95% CI)<br>Per 1,000 PM | Events / PM   | Rate (95% CI)<br>Per 1,000 PM | Events / PM     | Rate (95% CI)<br>Per 1,000 PM | Events / PM     | Rate (95% CI)<br>Per 1,000 PM |
| 2003         | 538 / 968     | 555.7 (523.8,587.4)           | 2483 / 3745   | 663.1 (647.6,678.2)           | 5397 / 7417     | 727.7 (717.4,737.8)           | 4805 / 9772     | 491.7 (481.8,501.7)           |
| 2004         | 324 / 835     | 387.4 (354.8,422.0)           | 1869 / 3118   | 599.4 (582.0,616.7)           | 3629 / 5258     | 609.2 (677.5,702.7)           | 3566 / 6599     | 540.3 (528.3,552.5)           |
| 2005         | 378 / 794     | 475.9 (440.8,511.5)           | 1912 / 3205   | 596.7 (579.3,613.6)           | 4233 / 5974     | 708.6 (696.9,720.1)           | 3526 / 6388     | 552.0 (357.7,377.1)           |
| 2006         | 308 / 887     | 347.1 (315.9,379.6)           | 2649 / 3819   | 693.5 (678.7,708.2)           | 5316 / 7077     | 751.2 (740.9,761.2)           | 5803 / 8880     | 653.5 (643.5,663.3)           |
| 2007         | 580 / 1083    | 535.9 (505.3,565.6)           | 2811 / 4577   | 614.2 (599.9,628.3)           | 6095 / 8360     | 729.1 (719.4,738.6)           | 10446 / 14246   | 733.3 (725.9,740.5)           |
| 2008         | 439 / 949     | 462.7 (430.5,494.9)           | 2951 / 4636   | 636.4 (622.5,650.4)           | 7155 / 9715     | 736.6 (719.4,738.6)           | 14455 / 21414   | 675.0 (668.7,681.3)           |
| 2009         | 658 / 1288    | 510.9 (483.2,538.5)           | 2979 / 4373   | 681.2 (667.2,695.0)           | 8288 / 10465    | 792.0 (784.1,799.7)           | 17287 / 23857   | 724.6 (718.9,730.3)           |
| 2010         | 596 / 1155    | 516.2 (486.8,545.2)           | 3198 / 4530   | 706.0 (692.5,719.2)           | 8857 / 11222    | 789.3 (781.6,796.8)           | 18298 / 24797   | 737.9 (732.4,743.4)           |
| 2011         | 675 / 1211    | 556.9 (528.9,585.6)           | 3029 / 4313   | 702.3 (688.4,715.9)           | 9835 / 11268    | 872.9 (866.5,878.9)           | 21285 / 27118   | 784.9 (780.0,789.8)           |
| 2012         | 769 / 1453    | 529.5 (503.2,555.2)           | 3780 / 5253   | 719.5 (707.2,731.7)           | 11782 / 13584   | 867.3 (861.5,873.0)           | 25915 / 30288   | 855.6 (851.6,859.6)           |
| 2013         | 713 / 1182    | 603.4 (574.7,631.2)           | 3291 / 4215   | 780.6 (768.0,793.2)           | 12093 / 13084   | 924.2 (919.6,928.7)           | 29760 / 34674   | 858.3 (854.6,861.9)           |
| 2014         | 660 / 1288    | 512.2 (484.7,540.0)           | 3069 / 4189   | 732.5 (719.0,746.0)           | 11717 / 13141   | 891.6 (886.2,896.9)           | 31490 / 36044   | 873.7 (870.2,877.1)           |
| 2015         | 802 / 1360    | 589.8 (563.0,616.0)           | 3767 / 4587   | 821.3 (809.8,832.2)           | 11539 / 12273   | 940.2 (935.9,944.3)           | 36297 / 42146   | 861.2 (857.9,864.5)           |
| 2016         | 755 / 1064    | 710.1 (681.3,736.7)           | 3913 / 4246   | 921.6 (913.1,929.5)           | 12965 / 13239   | 979.3 (976.7, 981.7)          | 36422 / 41928   | 868.7 (865.4,871.9)           |
| 2017         | 951 / 1571    | 605.5 (580.7,629.6)           | 3448 / 4424   | 779.4 (766.9,791.5)           | 15875 / 15844   | 1002 (987.2,1017)             | 47227 / 53142   | 888.7 (886.0,891.4)           |
| 2018         | 1008 / 1647   | 612.2 (588.0,635.6)           | 3867 / 4742   | 815.4 (804.1,826.4)           | 16649 / 16119   | 1033 (1018, 1048)             | 50355 / 63013   | 799.1 (796.0,802.2)           |
| 2019         | 709 / 996     | 711.6 (682.6,739.8)           | 2999 / 3345   | 896.6 (885.7,906.7)           | 10210 / 10113   | 1010 (991.0,1028)             | 33803 / 43674   | 774.0 (770.0,777.9)           |
| 2020         | 28 / 53       | 521.5 (386.4,667.0)           | 216 / 188     | 1148 (1008, 1302)             | 672 / 643       | 1046 (971.4, 1123)            | 2300 / 2902     | 792.6 (777.3,807.2)           |
| <b>Total</b> | 10891 / 19785 | 550.5 (543.5,557.4)           | 52230 / 71505 | 730.4 (727.2,733.7)           | 162309 / 184796 | 878.3 (876.8,879.8)           | 393043 / 490885 | 800.7 (799.6,801.8)           |



**Supplemental Table 17.** Crude rates of prescribed antidepressants by race and ethnicity, 2003 - 2020

|              | Asian         |                               | Black         |                               | Hispanic      |                               | White           |                               |
|--------------|---------------|-------------------------------|---------------|-------------------------------|---------------|-------------------------------|-----------------|-------------------------------|
|              | Events / PM   | Rate (95% CI)<br>Per 1,000 PM | Events / PM   | Rate (95% CI)<br>Per 1,000 PM | Events / PM   | Rate (95% CI)<br>Per 1,000 PM | Events / PM     | Rate (95% CI)<br>Per 1,000 PM |
| 2003         | 205 / 375     | 545.6 (494.7,597.8)           | 1164 / 2458   | 473.5 (453.7,493.5)           | 532 / 1050    | 506.5 (476.0,537.3)           | 11323 / 18019   | 628.4 (621.3,635.5)           |
| 2004         | 15 / 124      | 117.1 (69.3,19.2)             | 648 / 1566    | 413.7 (389.3,438.6)           | 447 / 956     | 467.2 (435.6,499.8)           | 8278 / 13164    | 628.8 (620.5,637.1)           |
| 2005         | 87 / 191      | 458.2 (383.4,529.0)           | 666 / 1408    | 473.0 (446.7,499.5)           | 386 / 929     | 415.3 (383.6,448.0)           | 8910 / 13833    | 644.1 (636.1,652.1)           |
| 2006         | 122 / 278     | 438.7 (379.6,499.4)           | 1315 / 1966   | 668.8 (647.6,689.7)           | 610 / 1233    | 495.2 (466.5,523.0)           | 12029 / 17187   | 699.9 (693.0,706.7)           |
| 2007         | 313 / 569     | 550.2 (508.1,591.5)           | 1804 / 2828   | 637.8 (619.9,655.6)           | 1340 / 2146   | 624.4 (603.5,645.0)           | 16475 / 22722   | 725.1 (719.2,730.9)           |
| 2008         | 431 / 647     | 667.1 (628.3,702.4)           | 2456 / 4163   | 589.9 (574.8,605.0)           | 1940 / 2943   | 659.2 (641.7,676.3)           | 20173 / 28961   | 696.6 (691.2,701.8)           |
| 2009         | 516 / 724     | 712.2 (678.2,745.4)           | 3163 / 4534   | 697.8 (684.0,711.0)           | 2622 / 3994   | 656.5 (641.5,671.2)           | 22911 / 30733   | 745.5 (740.6,750.3)           |
| 2010         | 559 / 807     | 692.2 (659.6,724.4)           | 3139 / 4791   | 655.2 (641.5,668.7)           | 2720 / 3923   | 711.2 (696.7,725.3)           | 24462 / 32183   | 760.0 (755.4,764.7)           |
| 2011         | 556 / 742     | 749.5 (716.5,780.1)           | 3683 / 4901   | 751.5 (739.1,763.5)           | 3336 / 4153   | 803.4 (790.9,815.3)           | 27249 / 34115   | 798.7 (794.4,803.0)           |
| 2012         | 489 / 798     | 612.8 (578.0,646.7)           | 4443 / 5925   | 749.9 (738.6,760.9)           | 3441 / 4413   | 779.7 (767.2,791.9)           | 33873 / 39442   | 858.8 (855.3,862.2)           |
| 2013         | 734 / 1087    | 675.3 (646.5,703.0)           | 4852 / 6047   | 802.4 (792.1,812.4)           | 4839 / 5617   | 861.6 (852.2,870.4)           | 35431 / 40405   | 876.9 (873.7,880.1)           |
| 2014         | 992 / 1193    | 831.9 (809.0,852.3)           | 4905 / 6158   | 796.4 (786.2,806.5)           | 4749 / 5835   | 813.9 (803.7,823.8)           | 36290 / 41476   | 875.0 (871.7,878.1)           |
| 2015         | 1230 / 1595   | 771.4 (749.7,791.6)           | 5253 / 6991   | 751.3 (741.1,761.5)           | 6116 / 6603   | 926.3 (919.7,932.4)           | 39807 / 45177   | 881.1 (878.1,884.1)           |
| 2016         | 995 / 1453    | 684.9 (660.2,708.6)           | 5149 / 6612   | 778.6 (768.5,788.7)           | 6019 / 6326   | 951.2 (945.9,956.6)           | 41892 / 46085   | 909.0 (906.4,911.6)           |
| 2017         | 1379 / 1496   | 922.2 (907.0,934.9)           | 9083 / 10409  | 872.6 (866.1,879.0)           | 8043 / 8817   | 912.2 (906.1,918.0)           | 48996 / 54259   | 903.0 (900.5,905.5)           |
| 2018         | 1363 / 1880   | 725.2 (704.2,745.1)           | 8478 / 10856  | 781.0 (773.0,788.7)           | 8239 / 10066  | 818.5 (810.8,826.0)           | 53799 / 62720   | 857.8 (855.0,860.5)           |
| 2019         | 802 / 1173    | 683.6 (656.2,710.3)           | 5719 / 7664   | 746.2 (736.3,755.9)           | 5511 / 6243   | 882.8 (874.5,890.6)           | 35690 / 43049   | 829.1 (825.7,832.8)           |
| 2020         | 83 / 87       | 957.5 (886.4,987.3)           | 427 / 500     | 854.0 (820.0,883.8)           | 367 / 392     | 935.2 (907.3,958.3)           | 2338 / 2806     | 833.3 (818.9,846.8)           |
| <b>Total</b> | 10873 / 15219 | 714.4 (707.2,721.6)           | 66346 / 89778 | 739.0 (736.1,741.9)           | 61327 / 75637 | 810.8 (808.0,813.6)           | 479927 / 586337 | 818.5 (817.5,819.5)           |

**Supplemental Table 18.** Crude rates of prescribed antidepressants by region, 2003 - 2020

|              | Midwest         |                               | Northeast       |                               | South           |                               | West            |                               |
|--------------|-----------------|-------------------------------|-----------------|-------------------------------|-----------------|-------------------------------|-----------------|-------------------------------|
|              | Events / PM     | Rate (95% CI)<br>Per 1,000 PM | Events / PM     | Rate (95% CI)<br>Per 1,000 PM | Events / PM     | Rate (95% CI)<br>Per 1,000 PM | Events / PM     | Rate (95% CI)<br>Per 1,000 PM |
| 2003         | 6109 / 10181    | 600.1 (590.4,609.6)           | 1784 / 2788     | 639.9 (621.7,657.7)           | 4365 / 7538     | 579.1 (567.8,590.2)           | 965 / 1394      | 692.1 (667.3,716.4)           |
| 2004         | 4219 / 6758     | 624.3 (612.6,635.9)           | 946 / 1988      | 475.6 (453.7,498.1)           | 3563 / 6056     | 588.4 (575.8,600.8)           | 660 / 1009      | 654.0 (623.9,683.5)           |
| 2005         | 4271 / 6796     | 628.5 (616.8,640.0)           | 894 / 1738      | 514.3 (490.6,538.1)           | 4049 / 6515     | 621.5 (609.6,633.3)           | 835 / 1312      | 636.8 (609.7,662.5)           |
| 2006         | 4473 / 6839     | 654.0 (642.6,665.3)           | 1528 / 2078     | 735.2 (715.8,754.2)           | 5861 / 8775     | 667.8 (658.0,677.8)           | 2215 / 2972     | 745.5 (729.2,760.9)           |
| 2007         | 4631 / 7316     | 633.1 (621.8, 644.1)          | 3192 / 4237     | 753.4 (740.1,766.3)           | 8295 / 11689    | 709.6 (701.3,717.9)           | 3814 / 5024     | 759.1 (747.1,770.9)           |
| 2008         | 4899 / 7856     | 623.7 (612.8,634.3)           | 2807 / 4585     | 612.1 (597.9,626.4)           | 8968 / 13613    | 658.8 (650.7,666.7)           | 8326 / 10659    | 781.1 (773.2,788.9)           |
| 2009         | 6044 / 9042     | 668.4 (658.6,678.1)           | 3277 / 4844     | 676.5 (663.1,689.7)           | 10691 / 14320   | 746.6 (739.4,753.7)           | 9201 / 11778    | 781.2 (773.6,788.6)           |
| 2010         | 6777 / 9741     | 695.7 (686.5,704.8)           | 3173 / 4413     | 719.1 (705.5,732.2)           | 12166 / 16380   | 742.7 (736.0,749.4)           | 8833 / 11169    | 790.8 (783.2,798.4)           |
| 2011         | 7658 / 10902    | 702.5 (693.8,711.0)           | 3956 / 4913     | 805.2 (793.9,816.2)           | 13306 / 16883   | 788.1 (781.9,794.3)           | 9905 / 11212    | 883.4 (877.3,889.3)           |
| 2012         | 8709 / 12802    | 680.3 (672.1,688.4)           | 5438 / 6854     | 793.3 (783.6,802.9)           | 17210 / 20276   | 848.8 (843.8,853.7)           | 10889 / 10646   | 1023 (1005,1041)              |
| 2013         | 8417 / 12779    | 658.6 (650.4,666.9)           | 6921 / 9477     | 730.3 (721.2,739.2)           | 16921 / 19126   | 884.7 (880.1,889.2)           | 13598 / 11775   | 1155 (1137,1173)              |
| 2014         | 8905 / 12983    | 685.9 (677.8,693.9)           | 6948 / 9962     | 697.5 (688.3,706.5)           | 18623 / 20155   | 923.4 (920.2,927.6)           | 12460 / 11562   | 1078 (1060,1096)              |
| 2015         | 9768 / 14163    | 689.7 (682.0,697.3)           | 7313 / 10536    | 694.1 (684.2,702.9)           | 22508 / 23584   | 954.4 (951.6,957.0)           | 12817 / 12083   | 1061 (1043,1078)              |
| 2016         | 11140 / 14871   | 749.1 (742.1,756.1)           | 6975 / 9746     | 715.7 (706.6,724.6)           | 22840 / 24508   | 931.9 (928.7,935.1)           | 13099 / 11352   | 1154 (1135,1173)              |
| 2017         | 12486 / 16728   | 746.4 (739.7,753.0)           | 7625 / 10510    | 725.5 (716.9,734.0)           | 32478 / 34522   | 940.8 (938.2,943.3)           | 14913 / 13220   | 1128 (1111,1145)              |
| 2018         | 14442 / 18354   | 786.9 (780.9,792.8)           | 9482 / 14488    | 654.5 (646.7,662.2)           | 32811 / 38551   | 851.1 (847.5,854.6)           | 15145 / 14130   | 1072 (1056,1088)              |
| 2019         | 9698 / 12295    | 788.8 (781.5,796.0)           | 7455 / 10356    | 719.8 (711.1,728.5)           | 22430 / 26202   | 856.0 (851.7,860.3)           | 8139 / 9275     | 877.5 (870.7,884.1)           |
| 2020         | 774 / 905       | 855.5 (830.6,877.5)           | 451 / 623       | 723.6 (687.0,758.7)           | 1498 / 1668     | 897.8 (882.6,912.2)           | 492 / 588       | 836.7 (804.3,865.7)           |
| <b>Total</b> | 133421 / 191309 | 697.4 (695.3,699.5)           | 80164 / 1441348 | 702.3 (553.6,558.7)           | 258583 / 310363 | 833.2 (831.8,834.5)           | 146306 / 151160 | 967.9 (967.0,968.8)           |

**Supplemental Table 19.** Crude rates of prescribed antidepressants among individuals with and without a diagnosis of depression in the year prior to first stroke, 2003–2020

|              | Prior Depression Dx<br>HR (95% CI) |                               | No Prior Depression Dx<br>HR (95% CI) |                               |
|--------------|------------------------------------|-------------------------------|---------------------------------------|-------------------------------|
|              | Events / PM                        | Rate (95% CI)<br>Per 1,000 PM | Events / PM                           | Rate (95% CI)<br>Per 1,000 PM |
| 2003         | 5411 / 7388                        | 732.4 (722.2–742.5)           | 7812 / 14513                          | 538.3 (530.1–546.4)           |
| 2004         | 5218 / 7329                        | 712.0 (701.4–722.3)           | 4169 / 8481                           | 491.4 (480.9–502.3)           |
| 2005         | 5747 / 8012                        | 717.3 (707.3–727.1)           | 4302 / 8349                           | 515.3 (504.5–526.0)           |
| 2006         | 8112 / 10253                       | 791.2 (783.2–799.0)           | 4964 / 10411                          | 572.8 (463.3–582.4)           |
| 2007         | 12587 / 15547                      | 809.6 (803.3–815.8)           | 7345 / 12718                          | 577.5 (468.9–586.1)           |
| 2008         | 14239 / 18751                      | 759.4 (753.2–765.5)           | 10761 / 17963                         | 599.0 (591.9–606.2)           |
| 2009         | 18397 / 22314                      | 824.5 (819.4–829.4)           | 10816 / 17671                         | 612.1 (608.3–622.8)           |
| 2010         | 19847 / 23973                      | 827.9 (823.1–832.6)           | 11102 / 17730                         | 626.2 (619.0–633.3)           |
| 2011         | 22950 / 25836                      | 888.3 (884.4–892.1)           | 11874 / 18074                         | 657.0 (650.0–663.9)           |
| 2012         | 28006 / 30126                      | 929.6 (926.7–932.5)           | 14240 / 20452                         | 696.3 (690.0–702.6)           |
| 2013         | 31747 / 32307                      | 982.7 (981.2–984.1)           | 14110 / 20849                         | 676.8 (670.4–683.1)           |
| 2014         | 32504 / 33468                      | 971.2 (969.3–973.0)           | 14431 / 21194                         | 680.9 (674.6–687.2)           |
| 2015         | 36907 / 36979                      | 998.1 (997.5–998.5)           | 15499 / 23387                         | 662.7 (656.6–668.8)           |
| 2016         | 37863 / 36459                      | 1038.5 (1028.6–1048.5)        | 16192 / 24018                         | 674.1 (668.2–680.1)           |
| 2017         | 45862 / 44563                      | 1029.1 (1020.2–1038.1)        | 21640 / 30418                         | 711.4 (706.3–716.5)           |
| 2018         | 50085 / 52208                      | 959.3 (957.6–961.0)           | 21795 / 33314                         | 654.2 (649.1–659.3)           |
| 2019         | 34496 / 36851                      | 936.1 (933.5–938.6)           | 13226 / 21277                         | 621.6 (615.1–628.1)           |
| 2020         | 2365 / 2367                        | 999.2 (997.0–999.9)           | 851 / 1418                            | 599.7 (574.1–625.8)           |
| <b>Total</b> | 412345 / 444732                    | 927.2 (926.4–927.9)           | 206129 / 322238                       | 639.7 (638.0–641.3)           |

**Supplemental Table 20.** Rate ratios for prescribed antidepressants among individuals with and without a diagnosis of depression in the year prior to first stroke, 2003–2020

|                           | <b>Prior Depression Dx</b><br>HR (95% CI) | <b>No Prior Depression Dx</b><br>HR (95% CI) |
|---------------------------|-------------------------------------------|----------------------------------------------|
| <b>Sex</b>                |                                           |                                              |
| Male                      | 1 (Ref)                                   | 1 (Ref)                                      |
| Female                    | 1.12 (1.10 – 1.14)                        | 1.17 (1.13 – 1.20)                           |
| <b>Age Group</b>          |                                           |                                              |
| 18 to 34                  | 1 (Ref)                                   | 1 (Ref)                                      |
| 35 to 49                  | 1.24 (1.15 – 1.34)                        | 1.27 (1.14 – 1.42)                           |
| 50 to 64                  | 1.46 (1.36 – 1.57)                        | 1.46 (1.32 – 1.62)                           |
| 65 and older              | 1.24 (1.15 – 1.33)                        | 1.26 (1.14 – 1.39)                           |
| <b>Race and Ethnicity</b> |                                           |                                              |
| White                     | 1 (Ref)                                   | 1 (Ref)                                      |
| Asian                     | 0.90 (0.84 – 0.98)                        | 0.83 (0.75 – 0.91)                           |
| Black                     | 0.98 (0.95 – 1.01)                        | 0.86 (0.82 – 0.89)                           |
| Hispanic                  | 1.00 (0.97 – 1.03)                        | 0.90 (0.86 – 0.94)                           |
| <b>Region</b>             |                                           |                                              |
| Midwest                   | 1 (Ref)                                   | 1 (Ref)                                      |
| Northeast                 | 1.02 (0.99 – 1.06)                        | 0.91 (0.87 – 0.96)                           |
| South                     | 1.18 (1.15 – 1.21)                        | 1.18 (1.14 – 1.22)                           |
| West                      | 1.33 (1.29 – 1.37)                        | 1.40 (1.34 – 1.45)                           |

**Supplemental Table 21.** Rate ratios for prescribed antidepressants following first stroke with alternative follow-up duration, 2003-2020

|                           | <b>Six Months</b><br>HR (95% CI) | <b>One Year</b><br>HR (95% CI) | <b>Five Years</b><br>HR (95% CI) |
|---------------------------|----------------------------------|--------------------------------|----------------------------------|
| <b>Sex</b>                |                                  |                                |                                  |
| Male                      | 1 (Ref)                          | 1 (Ref)                        | 1 (Ref)                          |
| Female                    | 1.16 (1.13 – 1.18)               | 1.19 (1.17 – 1.21)             | 1.20 (1.18 – 1.22)               |
| <b>Age Group</b>          |                                  |                                |                                  |
| 18 to 34                  | 1 (Ref)                          | 1 (Ref)                        | 1 (Ref)                          |
| 35 to 49                  | 1.28 (1.19 – 1.37)               | 1.27 (1.19 – 1.35)             | 1.28 (1.20 – 1.36)               |
| 50 to 64                  | 1.40 (1.31 – 1.49)               | 1.49 (1.41 – 1.58)             | 1.52 (1.43 – 1.62)               |
| 65 and older              | 1.11 (1.04 – 1.18)               | 1.23 (1.16 – 1.30)             | 1.25 (1.17 – 1.32)               |
| <b>Race and Ethnicity</b> |                                  |                                |                                  |
| White                     | 1 (Ref)                          | 1 (Ref)                        | 1 (Ref)                          |
| Asian                     | 0.89 (0.83 – 0.95)               | 0.85 (0.80 – 0.90)             | 0.83 (0.78 – 0.89)               |
| Black                     | 0.91 (0.88 – 0.93)               | 0.92 (0.89 – 0.94)             | 0.92 (0.89 – 0.94)               |
| Hispanic                  | 0.95 (0.92 – 0.98)               | 0.96 (0.93 – 0.99)             | 0.95 (0.92 – 0.98)               |
| <b>Region</b>             |                                  |                                |                                  |
| Midwest                   | 1 (Ref)                          | 1 (Ref)                        | 1 (Ref)                          |
| Northeast                 | 0.97 (0.94 – 1.01)               | 0.99 (0.96 – 1.02)             | 1.00 (0.98 – 1.03)               |
| South                     | 1.20 (1.17 – 1.23)               | 1.18 (1.15 – 1.20)             | 1.17 (1.14 – 1.19)               |
| West                      | 1.35 (1.31 – 1.39)               | 1.36 (1.32 – 1.39)             | 1.28 (1.25 – 1.32)               |
